# Supplementary material
Source: publisher figshare collection journal article supplement (https://tandf.figshare.com/articles/dataset/_/1054786)
Supplement: Supplementary file 1 [file 2]

## Appendix

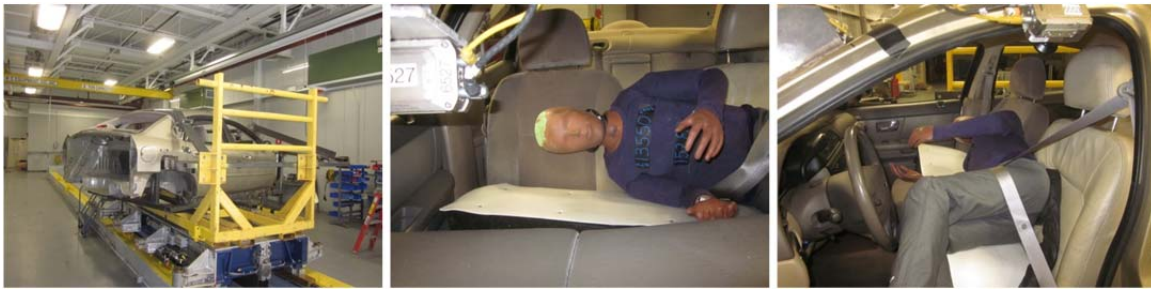

Figure A1: Side sled setup with belted dummy laying on her right side.

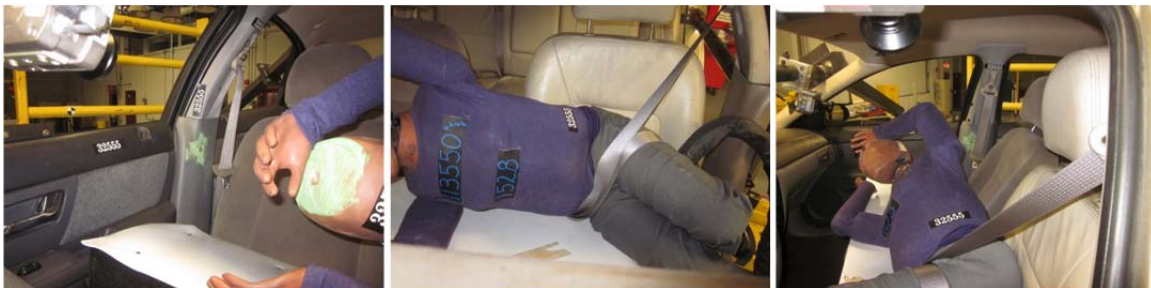

Figure A2: Post-test head contact on the B-pillar trim and dummy position in the belts.

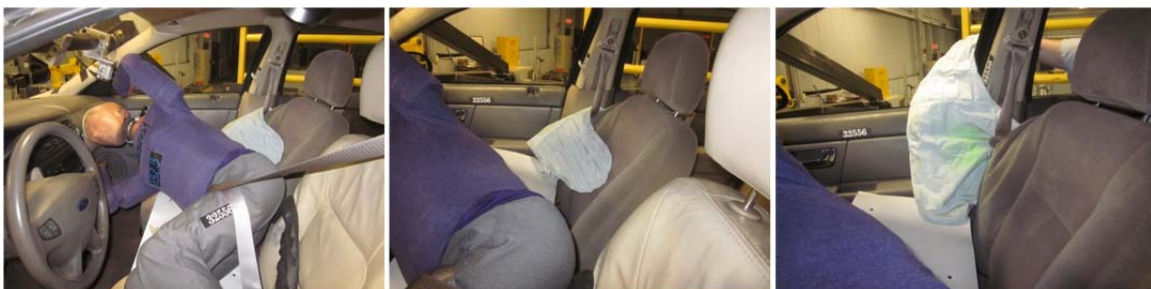

Figure A3: Post-test head contact on the combo airbag and dummy position in the belts.

Table A1: Peak responses in the four far-side impact tests.

|                                                      |           | Peak Biomechanical Responses |            |           |            | 5th IARV | Percent of IARV |            |           |            |
|------------------------------------------------------|-----------|------------------------------|------------|-----------|------------|----------|-----------------|------------|-----------|------------|
|                                                      |           | H32534                       | H32535     | H32555    | H32556     |          | H32534          | H32535     | H32555    | H32556     |
| Ford Taurus                                          |           | Driver No                    | Driver Yes | Driver No | Driver Yes |          | Driver No       | Driver Yes | Driver No | Driver Yes |
| <b>Side combo airbag</b><br>(69.5 kg 5th Hybrid III) |           |                              |            |           |            |          |                 |            |           |            |
| <b>Sled Vel</b>                                      | (km/h)    | -33                          | -33        | -24       | -25        |          |                 |            |           |            |
| <b>Sled Acc</b>                                      | (g)       | -41.3                        | -41.3      | -20.0     | -21.0      |          |                 |            |           |            |
| <b>Impact</b>                                        | (N)       | -15,272                      | -15,153    | -4,691    | -4,838     |          |                 |            |           |            |
| <b>Force z</b>                                       |           |                              |            |           |            |          |                 |            |           |            |
| <b>Head Acc</b>                                      | Res. (g)  | 236                          | 262        | 93        | 72         | 193      | 122%            | 136%       | 48%       | 37%        |
| <b>HIC<sub>36</sub></b>                              |           | 930                          | 1,208      | 171       | 123        | 1000     | 93%             | 121%       | 17%       | 12%        |
| <b>HIC<sub>15</sub></b>                              |           | 930                          | 1,183      | 171       | 123        | 779      | 119%            | 152%       | 22%       | 16%        |
|                                                      | Fx (N)    | 1,985                        | 476        | 108       | 60         | 1,950    | 102%            | 24%        | 6%        | 3%         |
|                                                      |           | -1,856                       | -2,703     | -636      | -830       | -1,950   | 95%             | 139%       | 33%       | 43%        |
|                                                      | Fy (N)    | 148                          | 287        | 89        | 144        | 1,950    | 8%              | 15%        | 5%        | 7%         |
|                                                      |           | -1,118                       | -653       | -68       | -261       | -1,950   | 57%             | 34%        | 3%        | 13%        |
|                                                      | Fz (N)    | 330                          | 1,126      | 222       | 127        | 2,620    | 13%             | 43%        | 8%        | 5%         |
| <b>Upper Neck</b>                                    |           | -13,385                      | -13,389    | -5,209    | -5,396     | -2,520   | 531%            | 531%       | 207%      | 214%       |
|                                                      | Mx (Nm)   | 22                           | 9          | 13        | 9          | 72       | 31%             | 12%        | 18%       | 13%        |
|                                                      |           | -11                          | -87        | -3        | -10        | -72      | 15%             | 120%       | 4%        | 14%        |
|                                                      | My (Nm)   | 37                           | 37         | 30        | 32         | 95       | 39%             | 39%        | 32%       | 33%        |
|                                                      | Corrected | -279                         | -221       | -53       | -93        | -49      | 569%            | 451%       | 108%      | 189%       |
|                                                      | Mz (Nm)   | 13                           | 11         | 2         | 4          | 49       | 27%             | 22%        | 5%        | 8%         |
|                                                      |           | -1                           | -8         | -2        | -1         | -49      | 1%              | 16%        | 5%        | 3%         |
|                                                      | Fx (N)    | 1,401                        | 1,034      | 324       | 244        | 1,950    | 72%             | 53%        | 17%       | 13%        |
|                                                      |           | -829                         | -1,413     | -272      | -375       | -1,950   | 43%             | 72%        | 14%       | 19%        |
|                                                      | Fy (N)    | 344                          | 503        | 54        | 121        | 1,950    | 18%             | 26%        | 3%        | 6%         |
| <b>Lower Neck</b>                                    |           | -4,421                       | -3,261     | -1,433    | -1,831     | -1,950   | 227%            | 167%       | 73%       | 94%        |
|                                                      | Fz (N)    | 83                           | 190        | 372       | 166        | 2,620    | 3%              | 7%         | 14%       | 6%         |
|                                                      |           | -12,540                      | -13,158    | -3,186    | -3,611     | -2,520   | 498%            | 522%       | 126%      | 143%       |
|                                                      | Mx (Nm)   | 40                           | 57         | 20        | 13         | 144      | 28%             | 40%        | 14%       | 9%         |
|                                                      |           | -124                         | -75        | -47       | -63        | -144     | 86%             | 52%        | 32%       | 44%        |
|                                                      | My (Nm)   | 160                          | 175        | 81        | 129        | 190      | 84%             | 92%        | 43%       | 68%        |
|                                                      | Corrected | -218                         | -246       | -13       | -13        | -98      | 222%            | 251%       | 13%       | 13%        |
| <b>Thoracic Spine</b>                                |           |                              |            |           |            |          |                 |            |           |            |
|                                                      | Fx (N)    | 1,274                        | 916        | 261       | 420        |          |                 |            |           |            |
|                                                      |           | -697                         | -1,164     | -222      | -235       |          |                 |            |           |            |
|                                                      | Fy (N)    | 857                          | 830        | 176       | 262        |          |                 |            |           |            |
|                                                      |           | -418                         | -254       | -337      | -251       |          |                 |            |           |            |
|                                                      | Fz (N)    | 51                           | 148        | 1,755     | 735        |          |                 |            |           |            |
|                                                      |           | -11,023                      | -9,670     | -1,078    | -988       |          |                 |            |           |            |
|                                                      | Mx (Nm)   | 86                           | 40         | 30        | 32         |          |                 |            |           |            |
|                                                      |           | -39                          | -211       | -42       | -32        |          |                 |            |           |            |
|                                                      | My (Nm)   | 437                          | 345        | 79        | 114        |          |                 |            |           |            |
|                                                      |           | -8                           | -9         | -32       | -42        |          |                 |            |           |            |
| <b>Lumbar Spine</b>                                  |           |                              |            |           |            |          |                 |            |           |            |
|                                                      | Fx (N)    | 943                          | 1,166      | 1,340     | 1,556      |          |                 |            |           |            |
|                                                      |           | -1,790                       | -1,387     | -314      | -486       |          |                 |            |           |            |
|                                                      | Fy (N)    | 307                          | 157        | 100       | 293        |          |                 |            |           |            |
|                                                      |           | -402                         | -211       | -312      | -188       |          |                 |            |           |            |
|                                                      | Fz (N)    | 2,955                        | 4,391      | 2,803     | 2,824      |          |                 |            |           |            |
|                                                      |           | -5,867                       | -4,524     | -282      | -352       |          |                 |            |           |            |
|                                                      | Mx (Nm)   | 26                           | 12         | 54        | 20         |          |                 |            |           |            |
|                                                      |           | -26                          | -12        | -206      | -89        |          |                 |            |           |            |
|                                                      | My (Nm)   | 65                           | 54         | 9         | 25         |          |                 |            |           |            |
|                                                      |           | -21                          | -21        | -131      | -153       |          |                 |            |           |            |
| <b>Chest</b>                                         | Res. (g)  | 77.0                         | 85.1       | 29.7      | 30.7       | 73       | 105%            | 117%       | 41%       | 42%        |
|                                                      | 3ms       | 55.0                         | 50.8       | 27.2      | 27.6       | 73       | 75%             | 70%        | 37%       | 38%        |
| <b>Lap belt</b>                                      | (N)       | --                           | --         | 2,806     | 2,675      |          |                 |            |           |            |
